# Supplementary material for: Carbon fiber-assisted iron carbide nanoparticles as an efficient catalyst via peroxymonosulfate activation for organic contaminant removal
Source: Royal Society of Chemistry journal article supplement (doi:10.1039/c9cy00756c), 2019-01-01
Supplement: c9cy00756c1.pdf [file c9cy00756c1.pdf]

## Supporting Information

### **Carbon Fibers-Assisted Iron Carbide Nanoparticles: as an Efficient Catalyst via Peroxymonosulfate Activation for Organic Contaminants Removal**

Shiyuan Gao<sup>a,‡</sup>, Haoran Zhou<sup>a,‡</sup>, Yannan Xia<sup>a</sup>, Xiudan Liu<sup>a</sup>, Yuyuan Yao<sup>a,\*</sup>, Wentao Wang<sup>a</sup>, Haixiang Chen<sup>a</sup>

<sup>a</sup>Key Laboratory of Advanced Textile Materials and Manufacturing Technology, Ministry of Education, Zhejiang Sci-Tech University, Hangzhou 310018, PR China.

E-mail: yyy0571@126.com; Fax: +86 571 86843255; Tel.: +86 571 86843

‡ These authors contributed equally to this work.

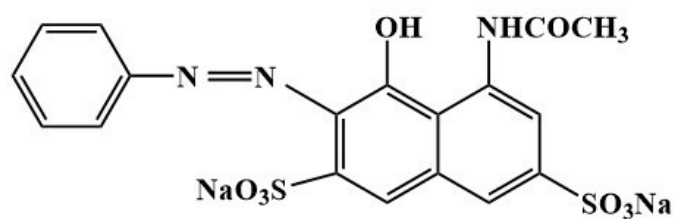

**Fig. S1** The chemical structure of AR1.

**Table S1** Catalytic Oxidation of Different Dyes. Conditions:  $\text{Fe}_3\text{C@CFs}$  dosage: 1 g/L,  $[\text{AO7}] = [\text{MO}] = [\text{KN-R}] = [\text{MB}] = 50 \mu\text{M}$ ,  $[\text{PMS}] = 1 \text{ mM}$ , sample's pH 10.0,  $T = 50 \text{ }^\circ\text{C}$ .

| Dyes<br>(50 $\mu\text{M}$ ) | PMS concentration (1.0mM)<br>Reaction time (14min) |                                 |
|-----------------------------|----------------------------------------------------|---------------------------------|
|                             | Removal rate (%)                                   | $K_{obs}$ ( $\text{min}^{-1}$ ) |
| AO 7                        | 97.7                                               | 0.282                           |
| MO                          | 98.0                                               | 0.270                           |
| KN-R                        | 95.1                                               | 0.227                           |
| MB                          | 94.8                                               | 0.216                           |

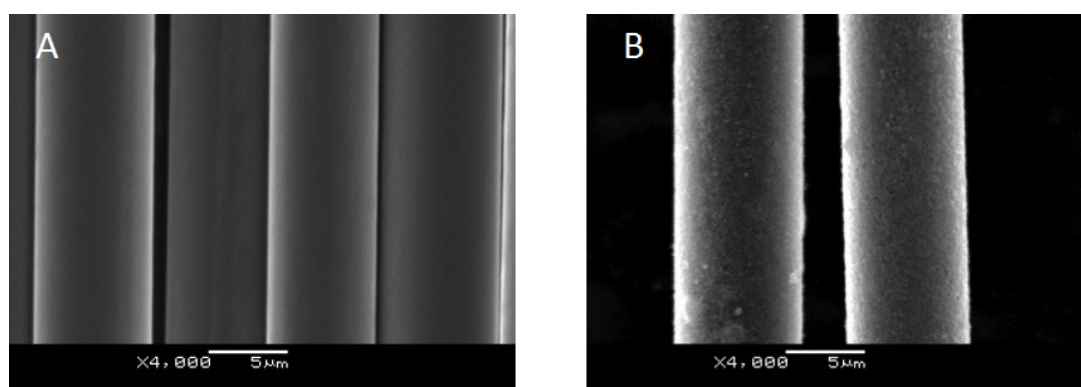

**Fig. S2** SEM images of (A) CFs and (B)  $\text{Fe}_3\text{C@CFs}$

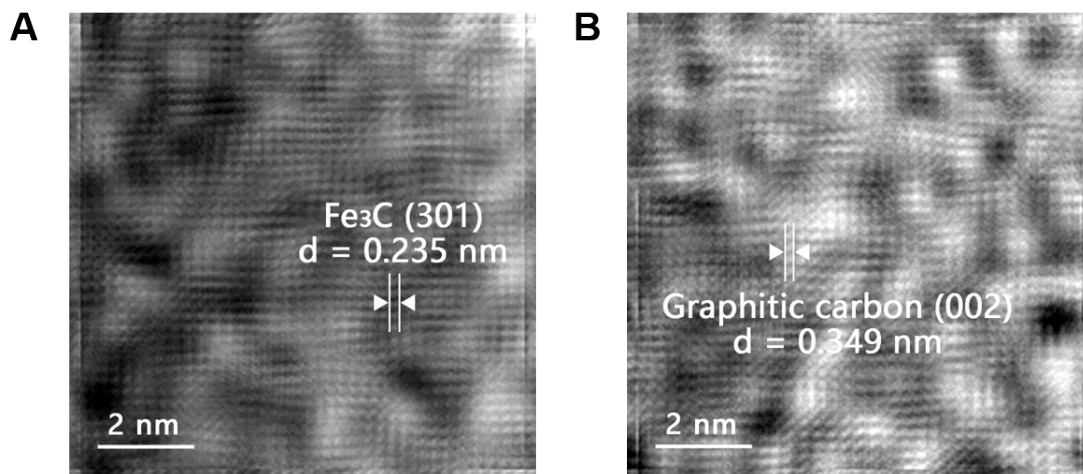

**Fig. S3** The inverse FFT images of (A)  $\text{Fe}_3\text{C}$ ; (B) Graphitic carbon on the outside of the nanoparticle.

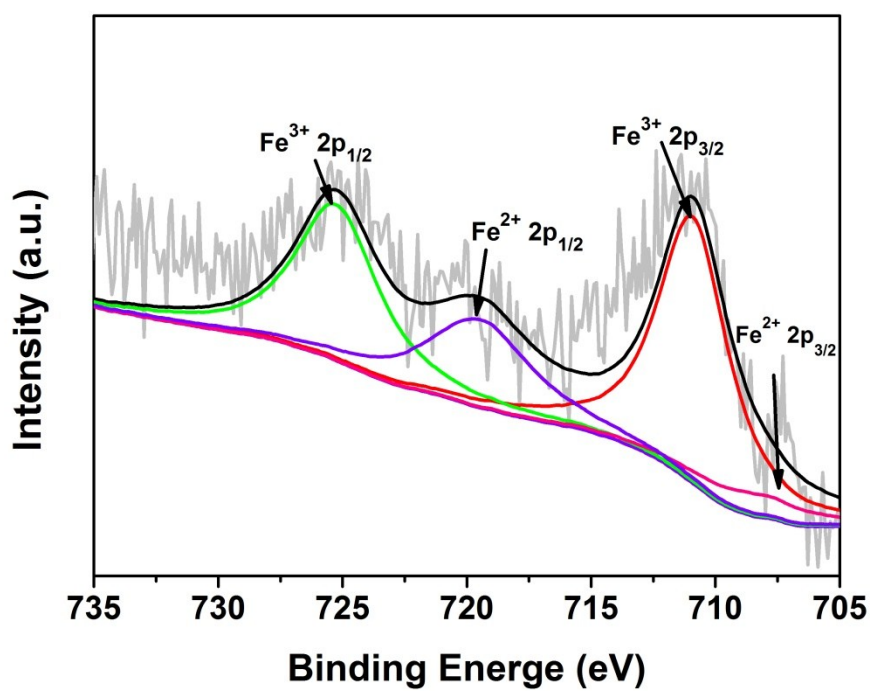

**Fig. S4** XPS spectrum of Fe 2p region for used catalyst.

**Table S2** The activation energies of other catalytic oxidation system.

| Catalysts                              | Organics    | $E_a$ (kJ/mol) | Reference  |
|----------------------------------------|-------------|----------------|------------|
| CoFe <sub>2</sub> O <sub>4</sub> /TNTs | Rhodamine B | 70.6           | 1          |
| Co <sub>3</sub> O <sub>4</sub>         | Phenol      | 66.2           | 2          |
| RuO <sub>2</sub> /AC                   | Phenol      | 61.4           | 3          |
| Mn <sub>3</sub> O <sub>4</sub> -rGO    | Orange II   | 49.5           | 4          |
| Fe@ACFs                                | RR M-3BE    | 32.9           | 5          |
| Fe <sub>3</sub> C-CFs                  | Acid red 1  | 24.47          | This study |

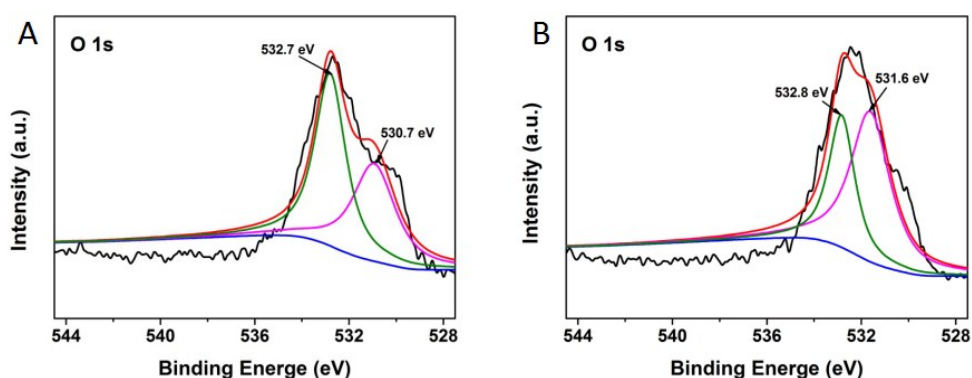**Fig. S5** XPS spectrum of O 1s region for (A) fresh and (B) used catalyst.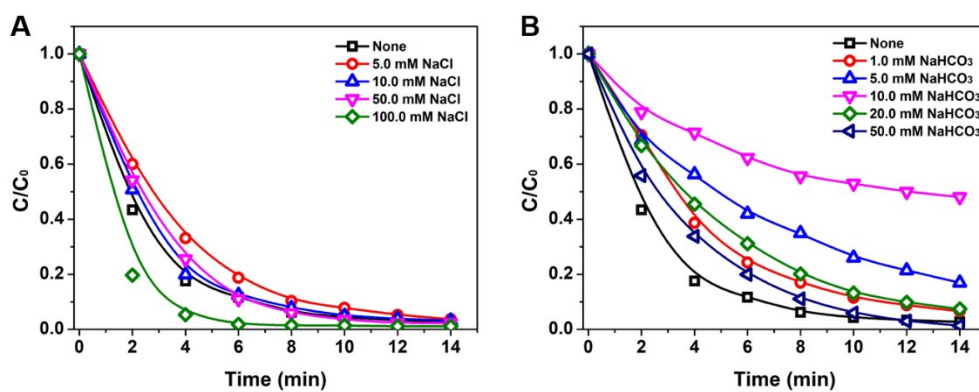**Fig. S6** Effect of different anions the removal of AR1. Conditions: Fe<sub>3</sub>C@CFs dosage: 1 g/L, [AR1]= 50  $\mu$ M, [PMS]=1 mM, sample's pH 10.0, T=50 °C.

**Reference:**

- 1 Y. Du, W. Ma, P. Liu, B. Zou and J. Ma, *J Hazard Mater*, 2016, **308**, 58-66.
- 2 E. Saputra, S. Muhammad, H. Sun, H. M. Ang, M. O. Tade and S. Wang, *J Colloid Interface Sci*, 2013, **407**, 467-473.
- 3 S. Muhammad, P. R. Shukla, M. O. Tade and S. Wang, *J Hazard Mater*, 2012, **215-216**, 183-190.
- 4 Y. Yao, C. Xu, S. Yu, D. Zhang and S. Wang, *Industrial & Engineering Chemistry Research*, 2013, **52**, 3637-3645.
- 5 F. Gong, L. Wang, D. Li, F. Zhou, Y. Yao, W. Lu, S. Huang and W. Chen, *Chemical Engineering Journal*, 2015, **267**, 102-110.
